# Supplementary material
Source: HighWire-hosted journal article supplement (https://bmjopen.bmj.com/content/12/6/e059919)
Supplement: inline-supplementary-material-1 [file inline-supplementary-material-1.pdf]

**Supplementary information****Protocol version 6**

Issue date: Dec 2021

Protocol amendment number: 04

Authors: BG, CB, LS, SDK

Revision chronology:

2019-Sept-25 Original

2021-Apr-04 Amendment 1

2021-Aug-11 Amendment 2

2021-Sept-07 Amendment 3

2021-Dec-05 Amendment 4

Primary reason for amendment:

- 1) Before start of recruitment: newly published, validated translation of QoR-15 in French, further secondary endpoints, randomisation using variable block sizes
- 2) After start of recruitment: Additional study centre
- 3) After start of recruitment: Additional methods for excluding pregnancy
- 4) After start of recruitment: change in PI in one centre which has not yet started the recruitment

|                                               |                                                                                                                                                        |
|-----------------------------------------------|--------------------------------------------------------------------------------------------------------------------------------------------------------|
| Primary registry and trial identifying number | ClinicalTrials.gov NCT04105660                                                                                                                         |
| Date of registration in primary registry      | 25 Sept, 2021                                                                                                                                          |
| Secondary identifying numbers                 | 2019-00132                                                                                                                                             |
| Source(s) of monetary or material support     | Swiss Life Jubiläumsstiftung<br>Foundation for Research and Education, University Basel<br>Foundation for Research and Education in Anaesthesia, Basel |
| Primary sponsor                               | University Hospital, Basel, Switzerland                                                                                                                |

|                                           |                                                                                                                                                                                                                                                                                                                                                                                                                                                                                                                                                                         |
|-------------------------------------------|-------------------------------------------------------------------------------------------------------------------------------------------------------------------------------------------------------------------------------------------------------------------------------------------------------------------------------------------------------------------------------------------------------------------------------------------------------------------------------------------------------------------------------------------------------------------------|
|                                           | Prof. Dr. Luzius Steiner, MD PhD<br><br>Chairman Clinic for Anaesthesiology, Intermediate Care, Prehospital Emergency Medicine and Pain Therapy                                                                                                                                                                                                                                                                                                                                                                                                                         |
| Secondary sponsor(s)                      | Kantospital Graubünden, Chur, Switzerland                                                                                                                                                                                                                                                                                                                                                                                                                                                                                                                               |
| Contact for public queries                | CB, SDK, LS                                                                                                                                                                                                                                                                                                                                                                                                                                                                                                                                                             |
| Contact for scientific queries            | CB, SDK, LS                                                                                                                                                                                                                                                                                                                                                                                                                                                                                                                                                             |
| Public title                              | Electroencephalogram (EEG) in General Anaesthesia - More Than Only a Bispectral Index (BIS)                                                                                                                                                                                                                                                                                                                                                                                                                                                                             |
| Scientific title                          | <i>Multicentre, double-blind, randomised controlled trial comparing propofol anaesthesia guided by bispectral index monitoring and frontal EEG wave analysis compared to standard monitoring in laparoscopic surgery</i>                                                                                                                                                                                                                                                                                                                                                |
| Countries of recruitment                  | Switzerland                                                                                                                                                                                                                                                                                                                                                                                                                                                                                                                                                             |
| Health condition(s) or problem(s) studied | Quality of recovery after general anaesthesia                                                                                                                                                                                                                                                                                                                                                                                                                                                                                                                           |
| Intervention(s)                           | Training for reading EEG curves during anaesthesia<br><br>Standard monitoring including clinical parameters and BIS index                                                                                                                                                                                                                                                                                                                                                                                                                                               |
| Key inclusion and exclusion criteria      | Ages eligible for study: $\geq 18$ years<br>Sexes eligible for study: both<br>Accepts healthy volunteers: no<br><br>Inclusion criteria: adult patient ( $\geq 18$ years), planned in-hospital laparoscopic surgery<br><br>Exclusion criteria: same-day surgery, language barrier, patients under 18 years of age, pregnancy, allergy to propofol, administration of hypnotics other than propofol, such as ketamine or midazolam preoperatively or intraoperatively, known brain pathology, such as seizure disorders, dementia, cerebrovascular disease or brain death |
| Study type                                | Interventional                                                                                                                                                                                                                                                                                                                                                                                                                                                                                                                                                          |
|                                           | Allocation: randomized intervention                                                                                                                                                                                                                                                                                                                                                                                                                                                                                                                                     |
|                                           | Primary purpose: better quality of recovery after general anaesthesia                                                                                                                                                                                                                                                                                                                                                                                                                                                                                                   |
|                                           | Phase – not applicable                                                                                                                                                                                                                                                                                                                                                                                                                                                                                                                                                  |
| Date of first enrolment                   | June 2021                                                                                                                                                                                                                                                                                                                                                                                                                                                                                                                                                               |
| Target sample size                        | 200                                                                                                                                                                                                                                                                                                                                                                                                                                                                                                                                                                     |
| Recruitment status                        | Recruiting                                                                                                                                                                                                                                                                                                                                                                                                                                                                                                                                                              |

|                        |                                                                                          |
|------------------------|------------------------------------------------------------------------------------------|
| Primary outcome(s)     | Quality of recovery (QoR): QoR-15 scale 24 hours after surgery                           |
| Key secondary outcomes | Propofol consumption, Time spent in postanaesthesia care unit (PACU), Time to extubation |
